# Supplementary material for: New Coronavirus Disease (COVID-19): Clinical Symptoms Other Than Pneumonia with Emphasis on Thrombosis
Source: Preprints.org preprint supplement (doi:10.20944/preprints202006.0339.v1), 2020-06-28

## Supplementary Data 1

### Symptoms of new coronavirus infection disease (COVID-19): Clinical symptoms such as thrombosis other than pneumonia

Hayashi T, Abiko K, Madai M, Yaegashi N, Konishi I.

#### Immunohistochemistry - tissues

The Human Protein Atlas contains images of histological sections from normal and cancer tissues obtained by immunohistochemistry. Antibodies are labeled with DAB (3,3'-diaminobenzidine) and the resulting brown staining indicates where an antibody has bound to its corresponding antigen. The section is furthermore counterstained with hematoxylin to enable visualization of microscopical features. Tissue microarrays are used to show antibody staining in samples from 144 individuals corresponding to 44 different normal tissue types (movie about tissue microarray production and immunohistochemical staining). Each sample is represented by 1 mm tissue cores, resulting in a total number of 576 images for each antibody. Normal tissues are represented by samples from three individuals each, one core per individual, except for endometrium, skin, soft tissue and stomach, which are represented by samples from six individuals each and parathyroid gland, which is represented by one sample. Protein expression is annotated in 76 different normal cell types present in these tissue samples. A small fraction of the 576 images are missing for most antibodies due to technical issues. Specimens containing normal tissue have been collected and sampled from anonymized paraffin embedded material of surgical specimens, in accordance with approval from the local ethics committee. For selected proteins extended tissue profiling is performed in addition to standard tissue microarrays. Examined tissues include mouse brain, human lactating breast, eye, thymus and extended samples of adrenal gland, skin and brain.

Since specimens are derived from surgical material, normal is here defined as non-neoplastic and morphologically normal. It is not always possible to obtain fully normal tissues and thus several of the tissues denoted as normal will include alterations due to inflammation, degeneration and tissue remodeling. In rare tissues, hyperplasia or benign proliferations are included as exceptions. It should also be noted that within normal morphology there may exist interindividual differences and variations due to primary diseases, age, sex etc. Such differences may also affect protein expression and thereby immunohistochemical staining patterns.

## **FANTOM5 CAGE data**

The Functional Annotation of Mammalian Genomes 5 (FANTOM5) project provides comprehensive expression profiles and functional annotation of mammalian cell-type specific transcriptomes using Cap Analysis of Gene Expression (CAGE) (Takahashi H *et al*, 2012), which is based on a series of full-length cDNA technologies developed in RIKEN. CAGE data for 60 of their tissues was obtained from the FANTOM5 repository and mapped to ENSEMBL. The normalized Tags Per Million for each gene were calculated and included in the Human Protein Atlas.

## **External blood RNA-seq data**

In addition to the blood cell type data generated within the Human Protein Atlas project, data from 15 blood cell types by Schmiedel *et al.* and 29 blood cell types as well as total PBMC by Monaco *et al.* have been incorporated into the Blood Atlas.

The Schmiedel dataset is available at the DICE (Database of Immune Cell Expression, Expression quantitative trait loci (eQTLs) and Epigenomics) database, which was established to address how genetic variants associated with risk for human diseases affect gene expression in various cell types. The TPM values per gene for 15 immune cell types were mapped to the corresponding genes in the Ensembl version used in the Human Protein Atlas.

The Monaco dataset contains data for 29 immune cell types within the peripheral blood mononuclear cell (PBMC) fraction of healthy donors using RNA-seq and flow cytometry. TPM values per transcript for 29 immune cells as well as total PBMC were mapped to the corresponding transcripts in the Ensembl version used in the Human Protein Atlas and summarized to pTPM values based only on protein coding transcripts.

<https://www.proteinatlas.org/about/assays+annotation#ihk>

| Lung                                         |
|----------------------------------------------|
| <b>HPA000288</b>                             |
| Female, age 61                               |
| Lung (T-28000)                               |
| Normal tissue, NOS (M-00100)                 |
| Patient id: 705                              |
| Macrophages                                  |
| Staining: <b>Low</b>                         |
| Intensity: <b>Weak</b>                       |
| Quantity: <b>75%-25%</b>                     |
| Location: <b>Cytoplasmic/<br/>membranous</b> |
| Pneumocytes                                  |
| Staining: <b>Not detected</b>                |
| Intensity: <b>Negative</b>                   |
| Quantity: <b>None</b>                        |
| Location: <b>None</b>                        |

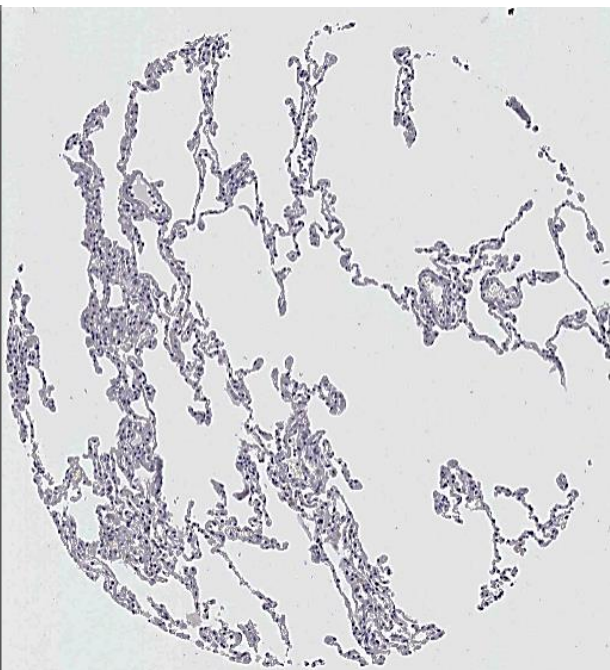

| Lung                                         |
|----------------------------------------------|
| <b>HPA000288</b>                             |
| Female, age 75                               |
| Lung (T-28000)                               |
| Normal tissue, NOS (M-00100)                 |
| Patient id: 496                              |
| Macrophages                                  |
| Staining: <b>Low</b>                         |
| Intensity: <b>Weak</b>                       |
| Quantity: <b>75%-25%</b>                     |
| Location: <b>Cytoplasmic/<br/>membranous</b> |
| Pneumocytes                                  |
| Staining: <b>Not detected</b>                |
| Intensity: <b>Negative</b>                   |
| Quantity: <b>None</b>                        |
| Location: <b>None</b>                        |

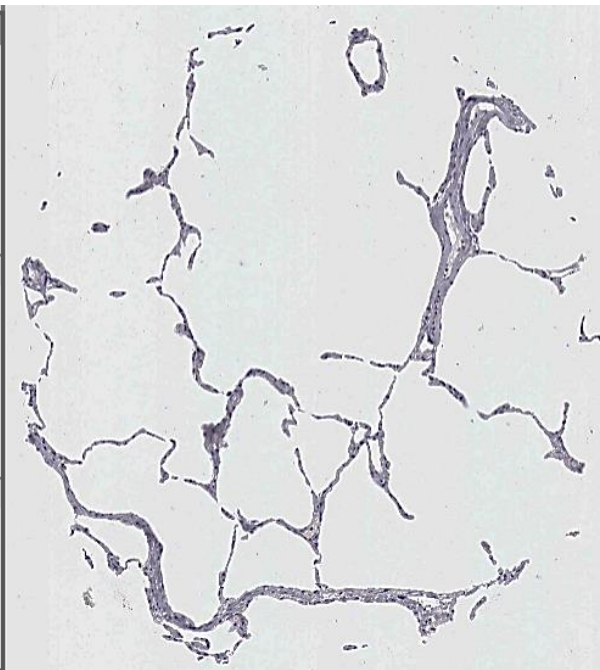

| Lung                                         |
|----------------------------------------------|
| <b>HPA000288</b>                             |
| Male, age 73                                 |
| Lung (T-28000)                               |
| Normal tissue, NOS (M-00100)                 |
| Patient id: 218                              |
| Macrophages                                  |
| Staining: <b>Low</b>                         |
| Intensity: <b>Weak</b>                       |
| Quantity: <b>75%-25%</b>                     |
| Location: <b>Cytoplasmic/<br/>membranous</b> |
| Pneumocytes                                  |
| Staining: <b>Not detected</b>                |
| Intensity: <b>Negative</b>                   |
| Quantity: <b>None</b>                        |
| Location: <b>None</b>                        |

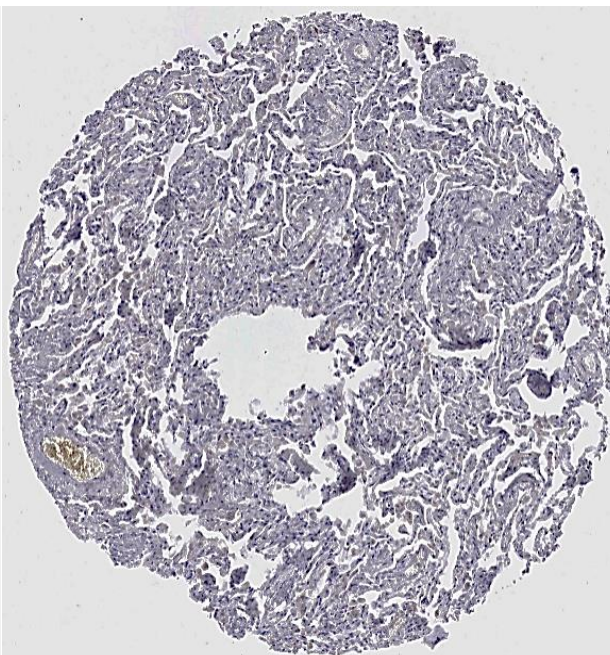



Lung

CAB026174

Female, age 49  
Lung (T-28000)  
Bronchus (T-26000)  
Normal tissue, NOS (M-00100)  
Patient id: 2268

Macrophages

Staining: Medium

Intensity: Moderate

Quantity: 75%-25%

Location: Cytoplasmic/  
membranous

Pneumocytes

Staining: Not detected

Intensity: Negative

Quantity: None

Location: None

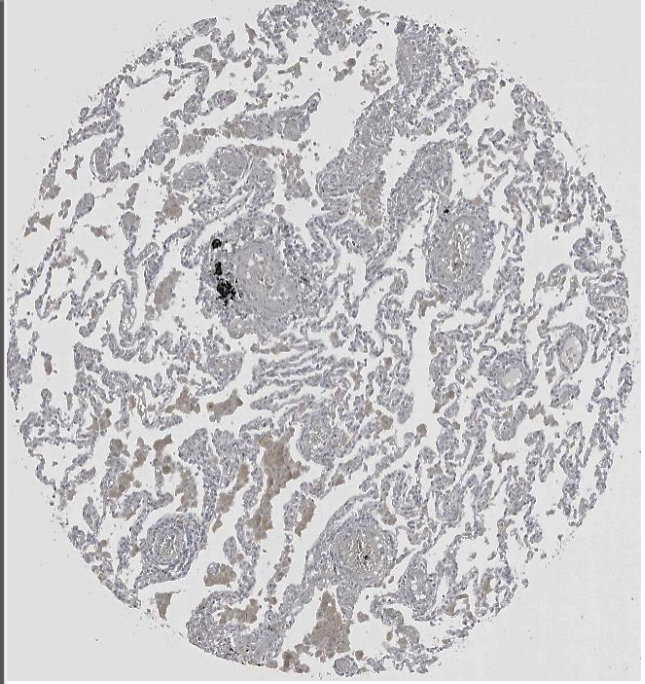

Lung

CAB026174

Male, age 59  
Lung (T-28000)  
Normal tissue, NOS (M-00100)  
Patient id: 2222

Macrophages

Staining: Medium

Intensity: Moderate

Quantity: 75%-25%

Location: Cytoplasmic/  
membranous

Pneumocytes

Staining: Not detected

Intensity: Negative

Quantity: None

Location: None

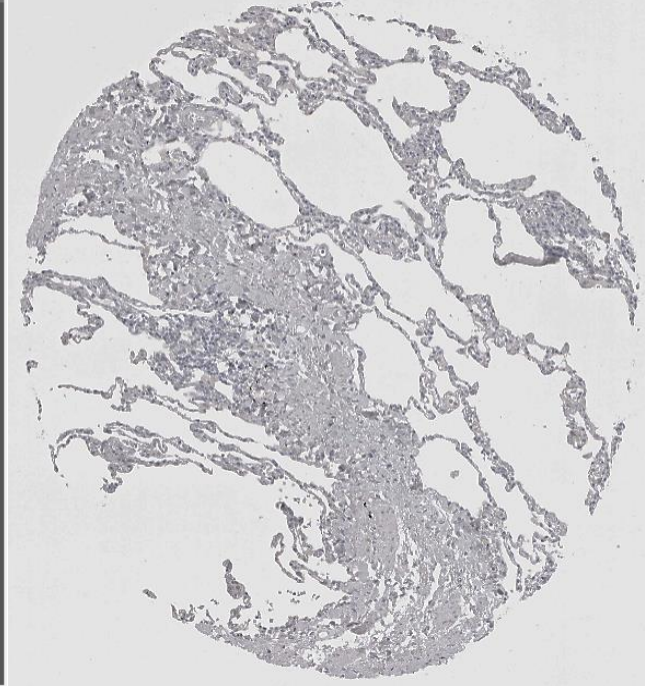

Lung

CAB026174

Male, age 21  
Lung (T-28000)  
Normal tissue, NOS (M-00100)  
Patient id: 2101

Macrophages

Staining: Medium

Intensity: Moderate

Quantity: 75%-25%

Location: Cytoplasmic/  
membranous

Pneumocytes

Staining: Not detected

Intensity: Negative

Quantity: None

Location: None

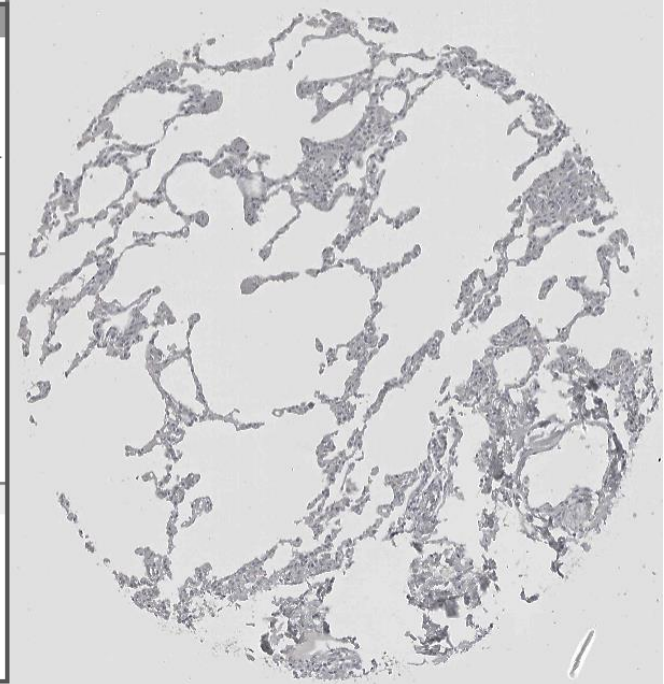



### Heart muscle

**HPA000288**

Female, age 19

Heart (T-32000)

Normal tissue, NOS (M-00100)

Patient id: 2524

### Myocytes

Staining: **Medium**

Intensity: **Moderate**

Quantity: **>75%**

Location: **Cytoplasmic/  
membranous**

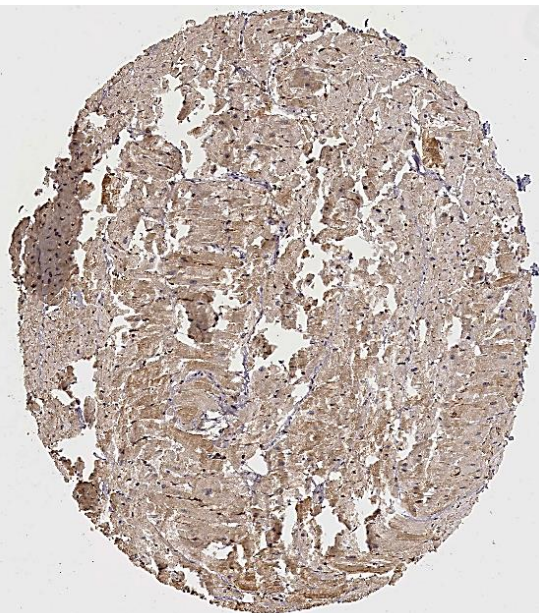

### Heart muscle

**HPA000288**

Female, age 54

Heart (T-32000)

Normal tissue, NOS (M-00100)

Patient id: 2523

### Myocytes

Staining: **Medium**

Intensity: **Moderate**

Quantity: **>75%**

Location: **Cytoplasmic/  
membranous**

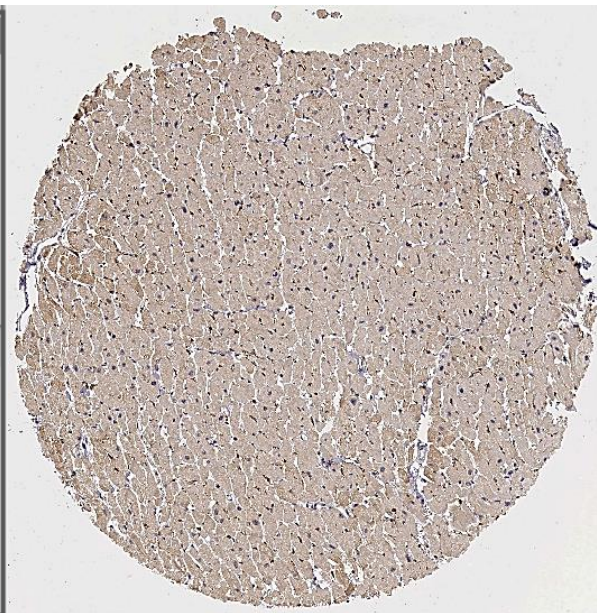

### Heart muscle

**CAB026174**

Male, age 49

Heart (T-32000)

Normal tissue, NOS (M-00100)

Patient id: 2278

### Myocytes

Staining: **Not detected**

Intensity: **Negative**

Quantity: **None**

Location: **None**

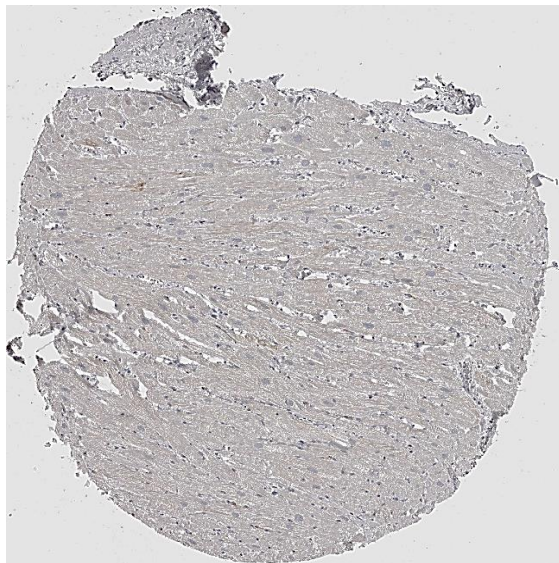



| Kidney                       |                            |
|------------------------------|----------------------------|
| <b>HPA000288</b>             |                            |
| Female, age 52               |                            |
| Kidney (T-71000)             |                            |
| Normal tissue, NOS (M-00100) |                            |
| Patient id: 1263             |                            |
| Cells in glomeruli           |                            |
| Staining:                    | Not detected               |
| Intensity:                   | Negative                   |
| Quantity:                    | None                       |
| Location:                    | None                       |
| Cells in tubules             |                            |
| Staining:                    | High                       |
| Intensity:                   | Strong                     |
| Quantity:                    | 75%-25%                    |
| Location:                    | Cytoplasmic/<br>membranous |

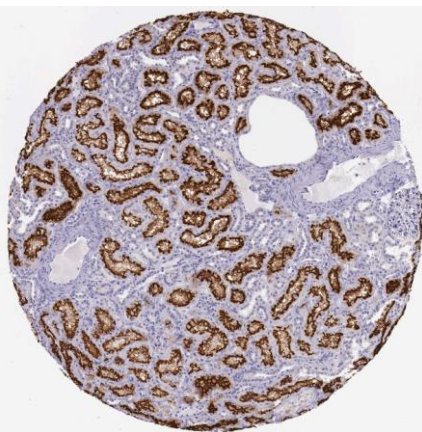

| Kidney                       |                            |
|------------------------------|----------------------------|
| <b>HPA000288</b>             |                            |
| Male, age 36                 |                            |
| Kidney (T-71000)             |                            |
| Normal tissue, NOS (M-00100) |                            |
| Patient id: 924              |                            |
| Cells in glomeruli           |                            |
| Staining:                    | Not detected               |
| Intensity:                   | Negative                   |
| Quantity:                    | None                       |
| Location:                    | None                       |
| Cells in tubules             |                            |
| Staining:                    | High                       |
| Intensity:                   | Strong                     |
| Quantity:                    | 75%-25%                    |
| Location:                    | Cytoplasmic/<br>membranous |

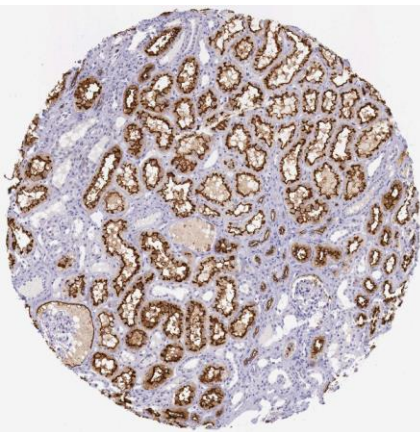

| Kidney                       |                            |
|------------------------------|----------------------------|
| <b>HPA000288</b>             |                            |
| Male, age 61                 |                            |
| Kidney (T-71000)             |                            |
| Normal tissue, NOS (M-00100) |                            |
| Patient id: 443              |                            |
| Cells in glomeruli           |                            |
| Staining:                    | Not detected               |
| Intensity:                   | Negative                   |
| Quantity:                    | None                       |
| Location:                    | None                       |
| Cells in tubules             |                            |
| Staining:                    | High                       |
| Intensity:                   | Strong                     |
| Quantity:                    | 75%-25%                    |
| Location:                    | Cytoplasmic/<br>membranous |

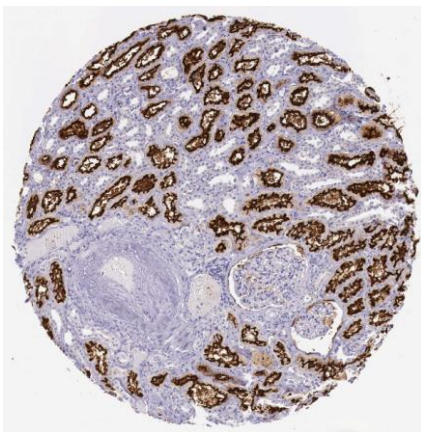

| Kidney                       |                            |
|------------------------------|----------------------------|
| <b>CAB026174</b>             |                            |
| Female, age 56               |                            |
| Kidney (T-71000)             |                            |
| Normal tissue, NOS (M-00100) |                            |
| Patient id: 1933             |                            |
| Cells in glomeruli           |                            |
| Staining:                    | Not detected               |
| Intensity:                   | Negative                   |
| Quantity:                    | None                       |
| Location:                    | None                       |
| Cells in tubules             |                            |
| Staining:                    | High                       |
| Intensity:                   | Strong                     |
| Quantity:                    | 75%-25%                    |
| Location:                    | Cytoplasmic/<br>membranous |

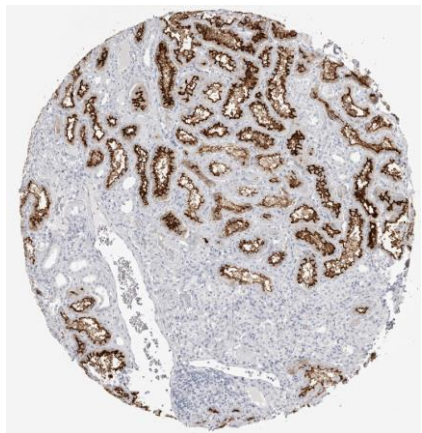

| Kidney                       |                            |
|------------------------------|----------------------------|
| <b>CAB026174</b>             |                            |
| Male, age 16                 |                            |
| Kidney (T-71000)             |                            |
| Normal tissue, NOS (M-00100) |                            |
| Patient id: 1767             |                            |
| Cells in glomeruli           |                            |
| Staining:                    | Not detected               |
| Intensity:                   | Negative                   |
| Quantity:                    | None                       |
| Location:                    | None                       |
| Cells in tubules             |                            |
| Staining:                    | High                       |
| Intensity:                   | Strong                     |
| Quantity:                    | 75%-25%                    |
| Location:                    | Cytoplasmic/<br>membranous |

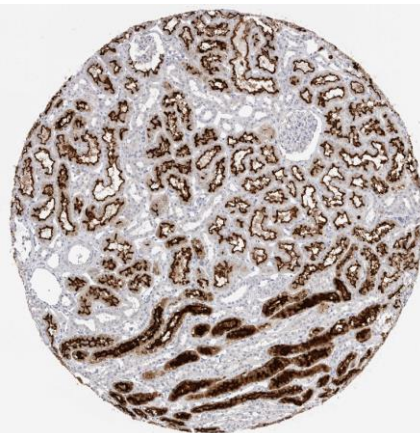

| Kidney                       |                            |
|------------------------------|----------------------------|
| <b>CAB026174</b>             |                            |
| Male, age 70                 |                            |
| Kidney (T-71000)             |                            |
| Normal tissue, NOS (M-00100) |                            |
| Patient id: 3356             |                            |
| Cells in glomeruli           |                            |
| Staining:                    | Not detected               |
| Intensity:                   | Negative                   |
| Quantity:                    | None                       |
| Location:                    | None                       |
| Cells in tubules             |                            |
| Staining:                    | High                       |
| Intensity:                   | Strong                     |
| Quantity:                    | 75%-25%                    |
| Location:                    | Cytoplasmic/<br>membranous |

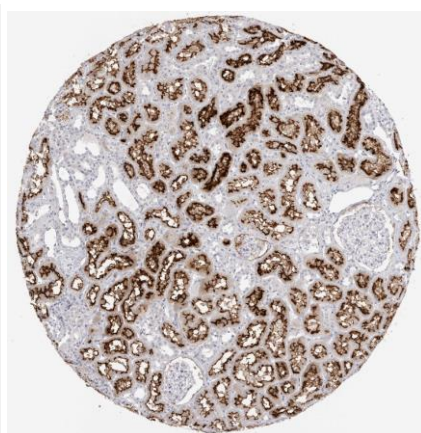

The normal histology section of the dictionary is based on representative sections from human tissues. Tissues have been collected from clinical specimens sent to the Department of Pathology at the Uppsala Akademiska hospital, Uppsala, Sweden for diagnostics. All specimens have been collected with consent of patients. All samples have been anonymized in accordance with ethical approval. Examples of normal tissue histology have been selected from regions in these surgical specimens where morphology appears as normal.

Tissues used in the dictionary have been formalin fixed, paraffin embedded and cut in 4  $\mu$ m thin sections and placed on glass slides. Glass slides containing tissue sections have been stained using hematoxylin-eosin (HE). Hematoxylin stains cell nuclei blue and eosin stains the cytoplasm and membrane of cells together with connective tissue and extracellular matrix in various shades of red color. Following HE-staining, the sections of tissue have been scanned to obtain high-quality images corresponding to 40x magnification in a microscope.

Histology is defined as the study of microscopical anatomy of cells. Assessment of histology provides important and basic information for our understanding of biology and medicine. Histology is also an integral part of pathology and microscopy-based diagnostics. Histological structures, in terms of pathological consideration, are thus important to recognize and relate to when distinguishing a particular disease from normal. In particular, inter-individual variations of the norm (for example related to age) can pose a challenge when distinguishing normal from a pathological condition.

<https://www.proteinatlas.org/learn/dictionary/normal>

# FANTOM5 CAGE data: ACE2 expression in human tissues

|    |                      |        |  |                     |       |  |
|----|----------------------|--------|--|---------------------|-------|--|
| 1  | cerebrum             | 0.027  |  | prostate            | 0.74  |  |
| 2  | cerebellum           | 0      |  | ovary               | 1.2   |  |
| 3  | brain stem           | 0.0669 |  | testis              | 3.7   |  |
| 4  | corpus callosum/glia | 0      |  | heart               | 2.021 |  |
| 5  | pineal gland         | 0.426  |  | muscle              | 0.508 |  |
| 6  | peripheral nerve     | 0      |  | esophagus           | 0.627 |  |
| 7  | spine                | 0.089  |  | stomach             | 0     |  |
| 8  | retina               | 0      |  | intestine           | 5.69  |  |
| 9  | eye                  | 0      |  | colon               | 2.424 |  |
| 10 | artery/aorta         | 0.335  |  | liver/hepato        | 0.84  |  |
| 11 | vein                 | 0.338  |  | lung                | 0.317 |  |
| 12 | lymphnode            | 0.4078 |  | bladder             | 0     |  |
| 13 | spleen               | 0      |  | kidney              | 2.86  |  |
| 14 | thymus               | 0      |  | pituitary           | 0     |  |
| 15 | bone marrow          | 2.98   |  | thyroid/parathyroid | 2.4   |  |
| 16 | adipose              | 1.57   |  | adrenal gland       | 0.189 |  |
| 17 | bone                 | 0      |  | pancreas            | 1.738 |  |
| 18 | skin                 | 0      |  | breast              | 1.8   |  |
| 19 | uterus               | 0.26   |  | salivary            | 0.357 |  |
| 20 | placenta             | 3.21   |  |                     |       |  |
| 21 |                      |        |  |                     |       |  |



Supplementary Data 2

Symptoms of new coronavirus infection disease (COVID-19): Clinical symptoms such as thrombosis other than pneumonia

Hayashi T, Abiko K, Madai M, Yaegashi N, Konishi I.

Expression of ACE2 in human tissues

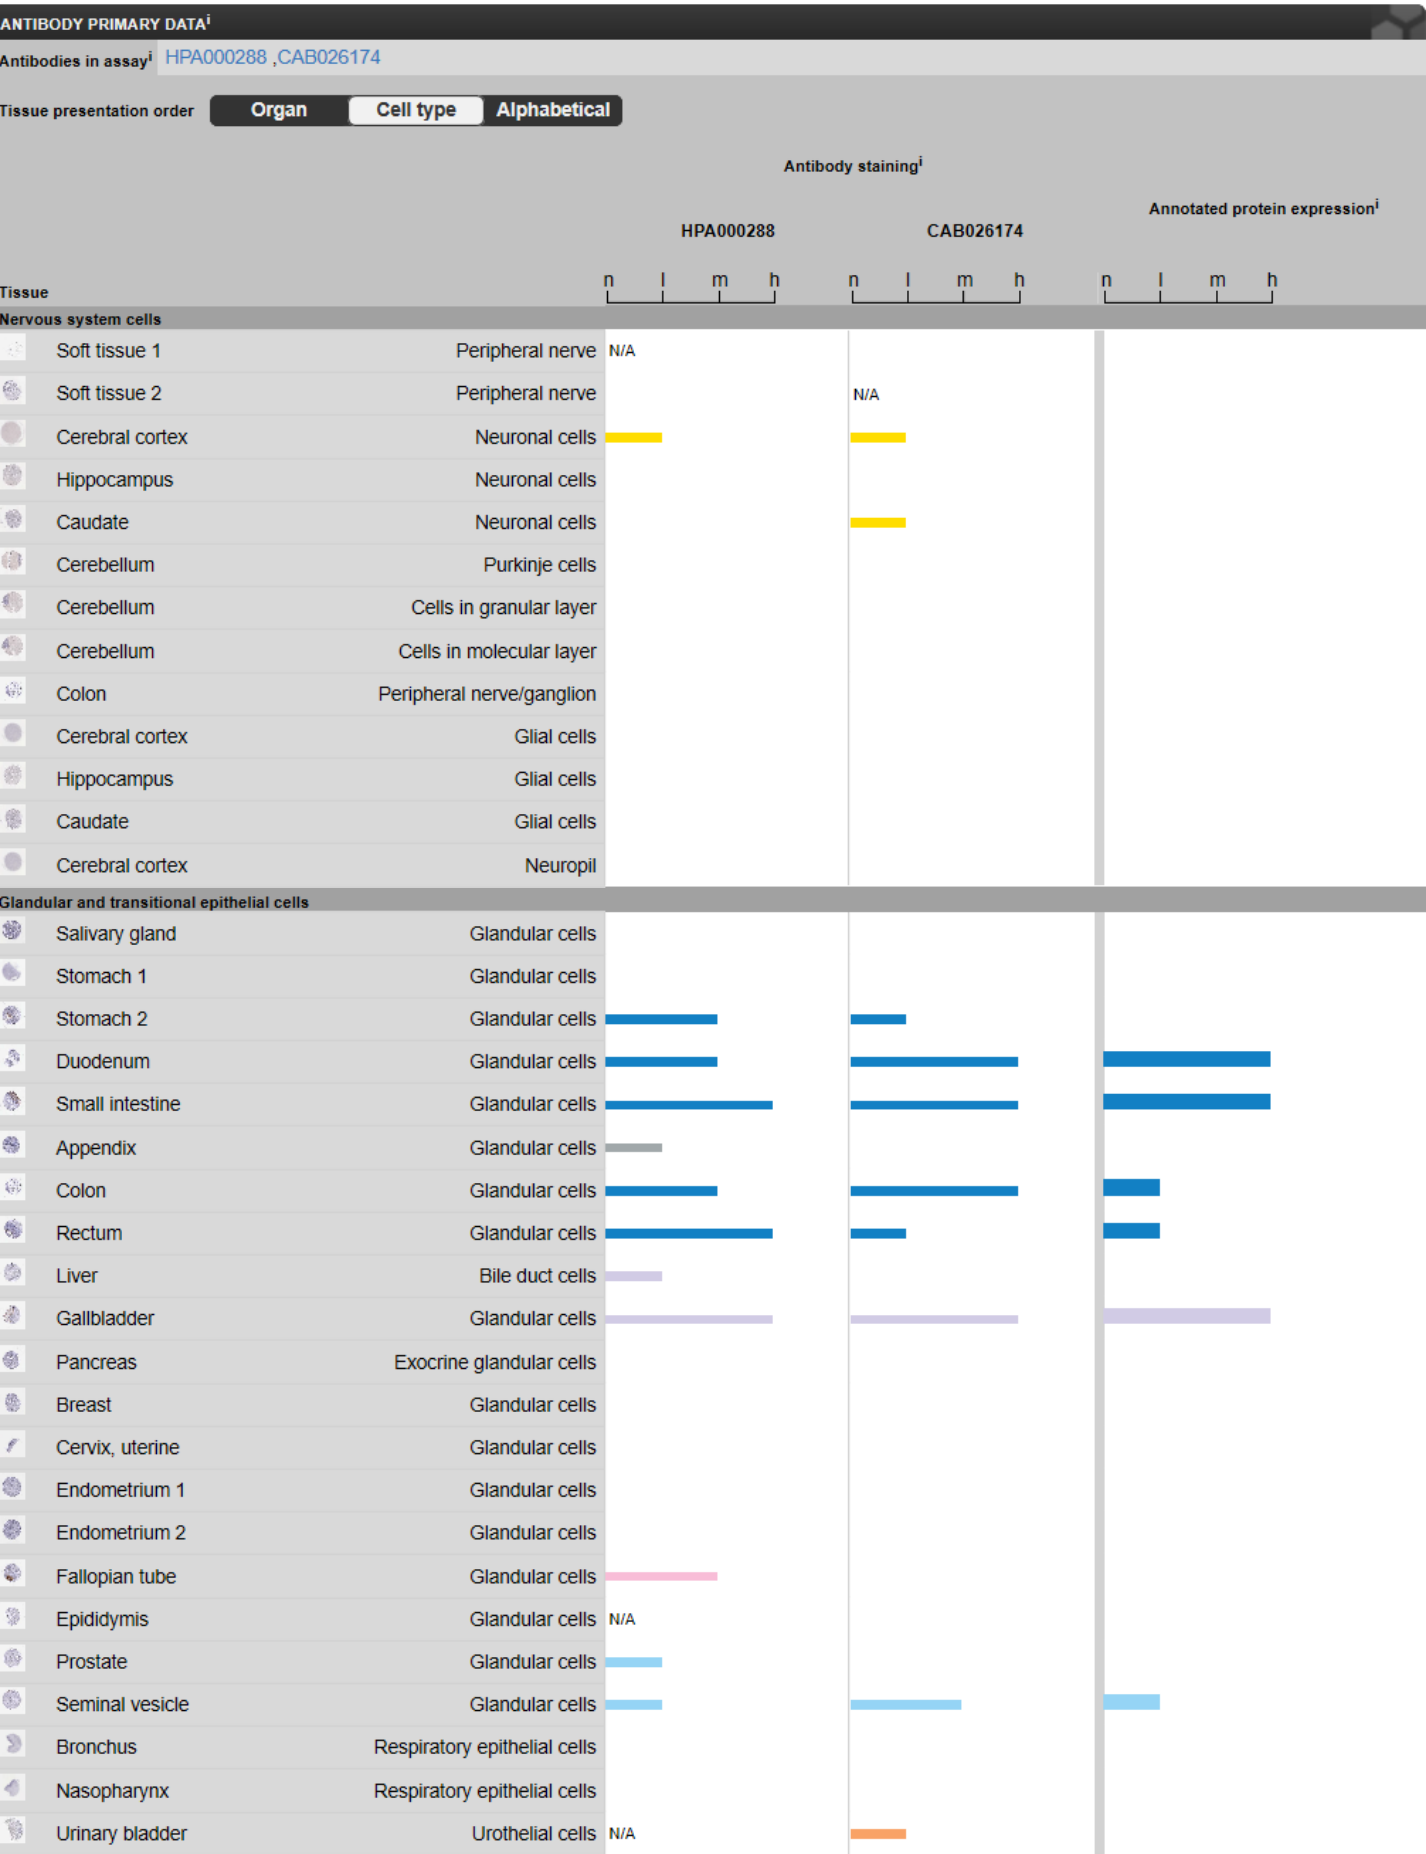

| Hematopoietic cells                                                               |                   |                             |             |             |             |
|-----------------------------------------------------------------------------------|-------------------|-----------------------------|-------------|-------------|-------------|
|      | Skin 1            | Langerhans                  |             |             |             |
|     | Bone marrow       | Hematopoietic cells         |             |             |             |
|    | Lymph node        | Germinal center cells       |             |             |             |
|    | Tonsil            | Germinal center cells       |             |             |             |
|    | Lymph node        | Non-germinal center cells   |             |             |             |
|    | Tonsil            | Non-germinal center cells   |             |             |             |
|    | Spleen            | Cells in white pulp         |             |             |             |
|    | Spleen            | Cells in red pulp           |             |             |             |
|    | Appendix          | Lymphoid tissue             |             |             |             |
|    | Lung              | Macrophages                 | <div></div> | <div></div> |             |
| Squamous epithelial cells                                                         |                   |                             |             |             |             |
|    | Skin 1            | Keratinocytes               |             | <div></div> |             |
|    | Skin 2            | Epidermal cells             |             |             |             |
|    | Vagina            | Squamous epithelial cells   |             |             |             |
|    | Cervix, uterine   | Squamous epithelial cells   |             |             |             |
|    | Oral mucosa       | Squamous epithelial cells   |             |             |             |
|    | Tonsil            | Squamous epithelial cells   |             |             |             |
|    | Esophagus         | Squamous epithelial cells   |             |             |             |
| Endocrine cells                                                                   |                   |                             |             |             |             |
|    | Pancreas          | Islets of Langerhans        |             |             |             |
|    | Thyroid gland     | Glandular cells             |             |             |             |
|    | Parathyroid gland | Glandular cells             |             |             |             |
|  | Adrenal gland     | Glandular cells             | <div></div> |             | <div></div> |
|  | Testis            | Leydig cells                | <div></div> | <div></div> | <div></div> |
| Mesenchymal cells                                                                 |                   |                             |             |             |             |
|  | Adipose tissue    | Adipocytes                  |             |             |             |
|  | Soft tissue 1     | Chondrocytes                |             | N/A         |             |
|  | Soft tissue 1     | Fibroblasts                 |             |             |             |
|  | Soft tissue 2     | Fibroblasts                 |             |             |             |
|  | Soft tissue 2     | Chondrocytes                | N/A         | N/A         |             |
|  | Skin 1            | Fibroblasts                 |             |             |             |
|  | Skeletal muscle   | Myocytes                    |             |             |             |
|  | Heart muscle      | Myocytes                    | <div></div> |             |             |
|  | Smooth muscle     | Smooth muscle cells         |             |             |             |
|  | Endometrium 1     | Cells in endometrial stroma |             |             |             |
|  | Endometrium 2     | Cells in endometrial stroma |             |             |             |
|  | Ovary             | Ovarian stroma cells        | <div></div> |             |             |
|  | Breast            | Adipocytes                  |             |             |             |

| Other cells                                                                     |                 |                                                                                                                                                                                                           |                                                                                   |                                                                                    |                                                                                     |
|---------------------------------------------------------------------------------|-----------------|-----------------------------------------------------------------------------------------------------------------------------------------------------------------------------------------------------------|-----------------------------------------------------------------------------------|------------------------------------------------------------------------------------|-------------------------------------------------------------------------------------|
|    | Liver           | Hepatocytes                                                                                                                                                                                               |                                                                                   |                                                                                    |                                                                                     |
|   | Skin 1          | Melanocytes                                                                                                                                                                                               |                                                                                   |                                                                                    |                                                                                     |
|  | Kidney          | Cells in glomeruli                                                                                                                                                                                        |                                                                                   |                                                                                    |                                                                                     |
|  | Kidney          | Cells in tubules                                                                                                                                                                                          |  |  |  |
|  | Lung            | Pneumocytes                                                                                                                                                                                               |                                                                                   |                                                                                    |                                                                                     |
|  | Testis          | Cells in seminiferous ducts                                                                                                                                                                               |  |  |  |
|  | Ovary           | Follicle cells                                                                                                                                                                                            |                                                                                   |                                                                                    |                                                                                     |
|  | Colon           | Endothelial cells                                                                                                                                                                                         |                                                                                   |                                                                                    |                                                                                     |
|  | Placenta        | Decidual cells                                                                                                                                                                                            | N/A                                                                               |                                                                                    |                                                                                     |
|  | Cerebral cortex | Endothelial cells                                                                                                                                                                                         |                                                                                   |                                                                                    |                                                                                     |
|  | Placenta        | Trophoblastic cells                                                                                                                                                                                       |  |                                                                                    |                                                                                     |
|  | Breast          | Myoepithelial cells                                                                                                                                                                                       |                                                                                   |                                                                                    |                                                                                     |
|                                                                                 |                 |                                                                                                                                                                                                           |                                                                                   |                                                                                    |                                                                                     |
| Staining summary <sup>i</sup>                                                   | HPA000288       | Strong cytoplasmic and membranous positivity was seen in glandular cells of gastrointestinal tract, gallbladder, renal tubules and testis. Remaining normal tissues were generally negative.              |                                                                                   |                                                                                    |                                                                                     |
|                                                                                 | CAB026174       | Strong membranous positivity was observed in renal tubules, gall bladder and intestinal cells. Testicular cells showed strong cytoplasmic staining. The remaining normal tissues were generally negative. |                                                                                   |                                                                                    |                                                                                     |

<https://www.proteinatlas.org/ENSG00000130234-ACE2/tissue/primary+data>

## Antibody Information

| Antibody HPA000288                                                                                         |                                                                                     |                                                                                         |                                                                                     | Antibody CAB026174                                                                     |                                                                                     |                                                                                           |                                                                                          |                                                                                       |
|------------------------------------------------------------------------------------------------------------|-------------------------------------------------------------------------------------|-----------------------------------------------------------------------------------------|-------------------------------------------------------------------------------------|----------------------------------------------------------------------------------------|-------------------------------------------------------------------------------------|-------------------------------------------------------------------------------------------|------------------------------------------------------------------------------------------|---------------------------------------------------------------------------------------|
| ANTIBODY INFORMATION                                                                                       |                                                                                     |                                                                                         |                                                                                     |                                                                                        |                                                                                     |                                                                                           |                                                                                          |                                                                                       |
| Provider                                                                                                   | Atlas Antibodies<br>Sigma-Aldrich                                                   |                                                                                         |                                                                                     | R&D Systems                                                                            |                                                                                     |                                                                                           |                                                                                          |                                                                                       |
| Product name                                                                                               | HPA000288                                                                           |                                                                                         |                                                                                     | MAB933                                                                                 |                                                                                     |                                                                                           |                                                                                          |                                                                                       |
| Host species                                                                                               | Rabbit                                                                              |                                                                                         |                                                                                     | Mouse                                                                                  |                                                                                     |                                                                                           |                                                                                          |                                                                                       |
| Clonality <sup>i</sup>                                                                                     | pAb                                                                                 |                                                                                         |                                                                                     | mAb                                                                                    |                                                                                     |                                                                                           |                                                                                          |                                                                                       |
| Purity                                                                                                     | Affinity purified using the PrEST-antigen as affinity ligand                        |                                                                                         |                                                                                     | Protein A/G                                                                            |                                                                                     |                                                                                           |                                                                                          |                                                                                       |
| Released in version <sup>i</sup>                                                                           | 1.2                                                                                 |                                                                                         |                                                                                     | 5                                                                                      |                                                                                     |                                                                                           |                                                                                          |                                                                                       |
| References <sup>i</sup>                                                                                    | 2                                                                                   |                                                                                         |                                                                                     |                                                                                        |                                                                                     |                                                                                           |                                                                                          |                                                                                       |
| Proper citation                                                                                            | Atlas Antibodies Cat#HPA000288, RRID:AB_1078160                                     |                                                                                         |                                                                                     | n/a                                                                                    |                                                                                     |                                                                                           |                                                                                          |                                                                                       |
| Validation summary <sup>i</sup>                                                                            |  |      |  |     |  |       |     |  |
|                                                                                                            | ICC                                                                                 | IHC  | WB                                                                                  | PA  | ICC                                                                                 | IHC  | WB  | PA                                                                                    |
| PROTEIN ARRAY                                                                                              |                                                                                     |                                                                                         |                                                                                     |                                                                                        |                                                                                     |                                                                                           |                                                                                          |                                                                                       |
| Validation <sup>i</sup>                                                                                    |  |                                                                                         |                                                                                     |                                                                                        |                                                                                     |                                                                                           |                                                                                          |                                                                                       |
|                                                                                                            | Approved                                                                            |                                                                                         |                                                                                     |                                                                                        |                                                                                     |                                                                                           |                                                                                          |                                                                                       |
|                                                                                                            | Pass with quality comment low specificity (binding to 1-2 PrESTs >15% and <40%).    |                                                                                         |                                                                                     |                                                                                        |                                                                                     |                                                                                           |                                                                                          |                                                                                       |
|                                                                                                            |  |                                                                                         |                                                                                     |                                                                                        |                                                                                     |                                                                                           |                                                                                          |                                                                                       |
| Antibody specificity analysis with protein arrays. Predicted and matching interactions are shown in green. |                                                                                     |                                                                                         |                                                                                     |                                                                                        |                                                                                     |                                                                                           |                                                                                          |                                                                                       |
| Antibody dilution: 1:2000                                                                                  |                                                                                     |                                                                                         |                                                                                     |                                                                                        |                                                                                     |                                                                                           |                                                                                          |                                                                                       |

<https://www.proteinatlas.org/ENSG00000130234-ACE2/antibody>



| IMMUNOHISTOCHEMISTRY <sup>i</sup>                                                                                                                                                                                                                                                                                                                                                               |                                                                                                                                                                                                                                                                                                                                                                                                                                                                                                               |                                                                                                                                                                                                                                                                                                                                                                                                                                                                                                                  |
|-------------------------------------------------------------------------------------------------------------------------------------------------------------------------------------------------------------------------------------------------------------------------------------------------------------------------------------------------------------------------------------------------|---------------------------------------------------------------------------------------------------------------------------------------------------------------------------------------------------------------------------------------------------------------------------------------------------------------------------------------------------------------------------------------------------------------------------------------------------------------------------------------------------------------|------------------------------------------------------------------------------------------------------------------------------------------------------------------------------------------------------------------------------------------------------------------------------------------------------------------------------------------------------------------------------------------------------------------------------------------------------------------------------------------------------------------|
| Validation <sup>i</sup>                                                                                                                                                                                                                                                                                                                                                                         | <div> <div>Enhanced - Orthogonal</div> <div>Antibody staining mainly consistent with RNA expression data across 36 tissues.</div> <div> <div>HIGH EXPRESSION</div> 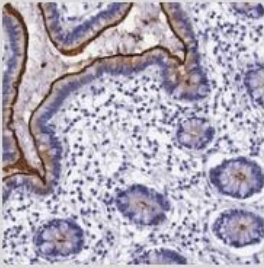 <div>Small intestine</div> <div>RNA expression: 122.0 NX</div> </div> <div> <div>LOW EXPRESSION</div>  <div>Liver</div> <div>RNA expression: 1.2 NX</div> </div> </div> | <div> <div>Enhanced - Orthogonal</div> <div>Antibody staining mainly consistent with RNA expression data across 36 tissues.</div> <div> <div>HIGH EXPRESSION</div>  <div>Small intestine</div> <div>RNA expression: 122.0 NX</div> </div> <div> <div>LOW EXPRESSION</div>  <div>Liver</div> <div>RNA expression: 1.2 NX</div> </div> </div> |
|                                                                                                                                                                                                                                                                                                                                                                                                 | <div>Retrieval<sup>i</sup></div> <div>Antibody dilution</div> <div>Literature conformity<sup>i</sup></div> <div>RNA consistency<sup>i</sup></div>                                                                                                                                                                                                                                                                                                                                                             | <div>Retrieval<sup>i</sup></div> <div>Antibody dilution</div> <div>Literature conformity<sup>i</sup></div> <div>RNA consistency<sup>i</sup></div>                                                                                                                                                                                                                                                                                                                                                                |
| WESTERN BLOT <sup>i</sup>                                                                                                                                                                                                                                                                                                                                                                       |                                                                                                                                                                                                                                                                                                                                                                                                                                                                                                               |                                                                                                                                                                                                                                                                                                                                                                                                                                                                                                                  |
| Validation <sup>i</sup>                                                                                                                                                                                                                                                                                                                                                                         | <div> <div>Uncertain<sup>i</sup></div> <div>Only bands not corresponding to the predicted size. Analysis performed using a standard panel of samples.</div> <div>Antibody dilution: 1:500</div> </div>                                                                                                                                                                                                                                                                                                        | <div> <div>Supported<sup>i</sup></div> <div>Band of predicted size in kDa (+/-20%) with additional bands present. Analysis performed using a standard panel of samples.</div>  <div>Antibody dilution: 1:500</div> </div>                                                                                                                                                                                                     |
| RELEVANT PUBLICATIONS                                                                                                                                                                                                                                                                                                                                                                           |                                                                                                                                                                                                                                                                                                                                                                                                                                                                                                               |                                                                                                                                                                                                                                                                                                                                                                                                                                                                                                                  |
| <div> <div>Gene expression profiling of metaplastic lineages identifies CDH17 as a prognostic marker in early stage gastric cancer</div> <div>Lee HJ et al</div> <div>Gastroenterology 2010;139(1):213-25.e3</div> <div>Variance decomposition of protein profiles from antibody arrays using a longitudinal twin model</div> <div>Kato BS et al</div> <div>Proteome Sci 2011;9:73</div> </div> |                                                                                                                                                                                                                                                                                                                                                                                                                                                                                                               |                                                                                                                                                                                                                                                                                                                                                                                                                                                                                                                  |

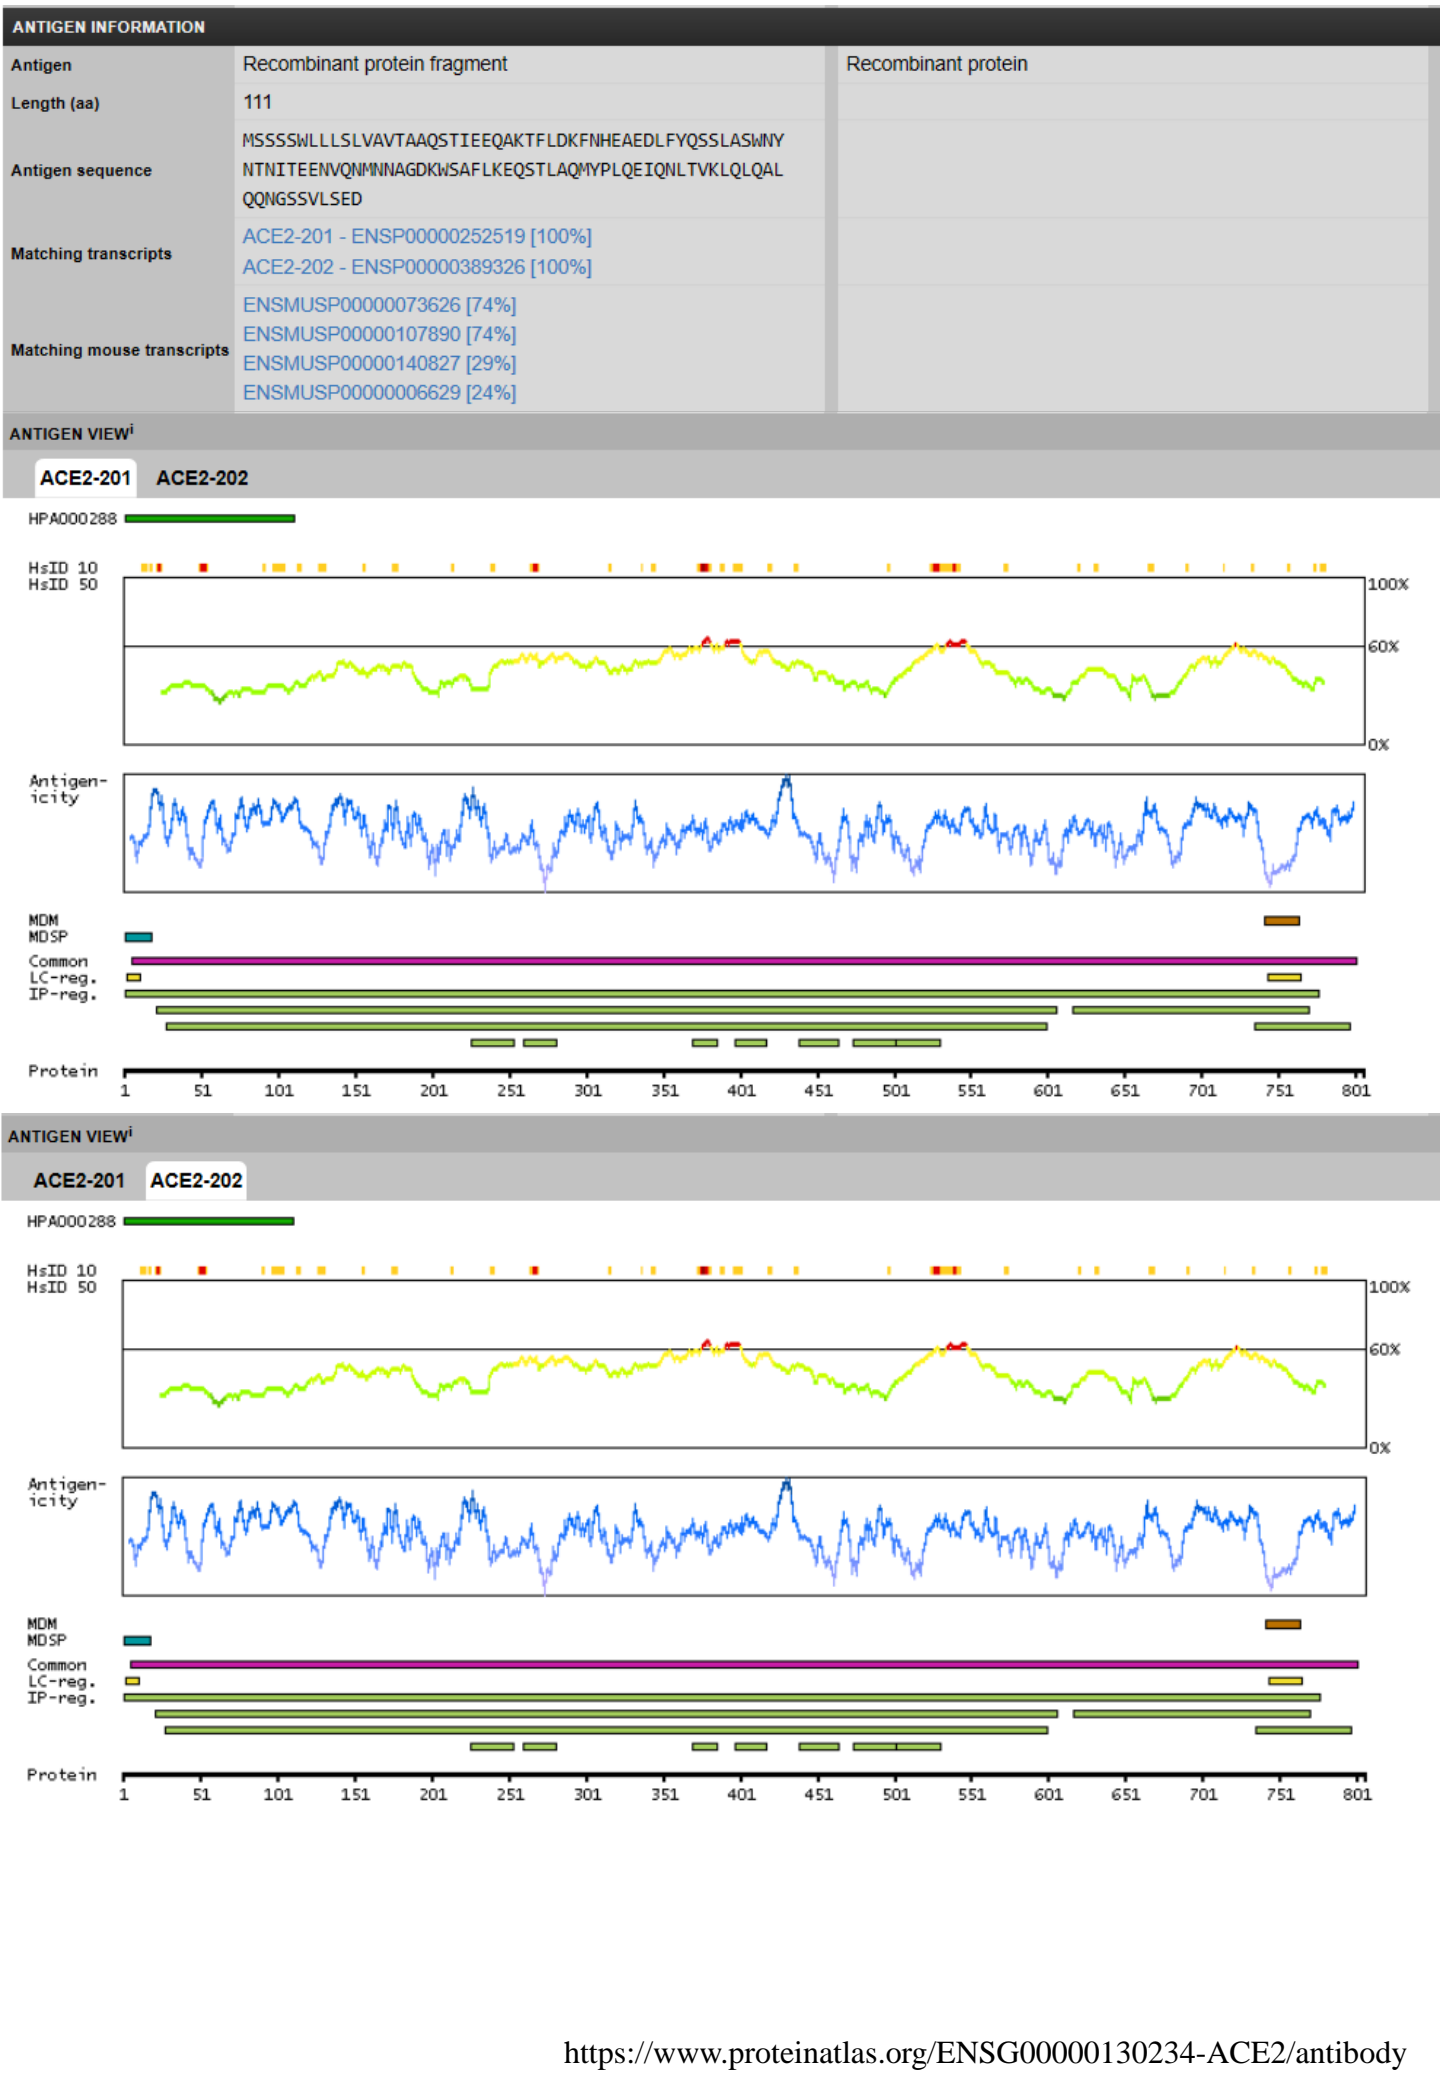

## Hematopoietic Stem Cell

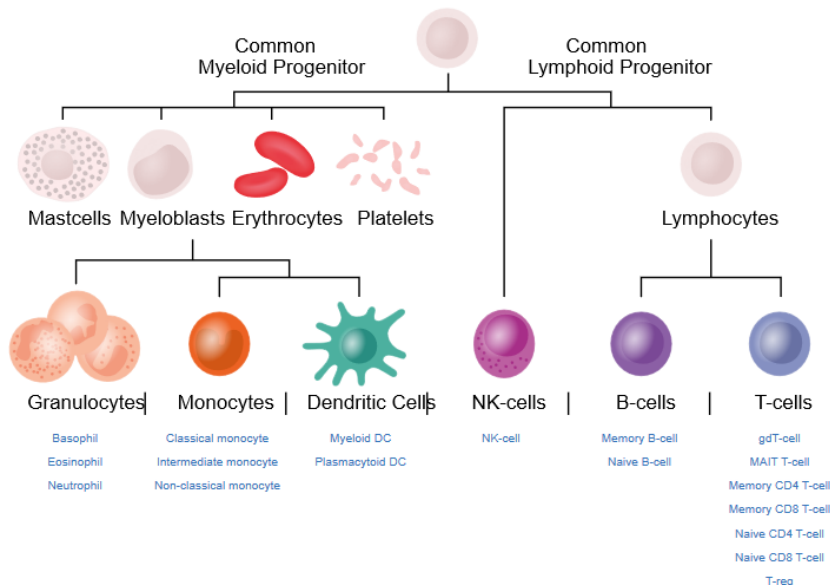

**Classical monocytes:** The classical monocyte is characterized by high level expression of the CD14 cell surface receptor (CD14++ CD16– monocyte).

**Non-classical monocytes:** The non-classical monocyte shows low level expression of CD14 and additional co-expression of the CD16 receptor (CD14+CD16++ monocyte).

**Intermediate monocytes:** The intermediate monocyte has high level expression of CD14 and low level expression of CD16 (CD14++CD16+ monocytes).

[https://www.proteinatlas.org/humanproteome/blood/monocytes#classical\\_monocytes](https://www.proteinatlas.org/humanproteome/blood/monocytes#classical_monocytes)

**TABLE 1 | Cell surface markers of mononuclear phagocytes in human lungs.**

| Ontogeny             | Macrophages                                                                        |                                                                                    |                                                                                    |                                                                                    | Committed DC progenitor                                                            |                                                                                      |                                                                                      |
|----------------------|------------------------------------------------------------------------------------|------------------------------------------------------------------------------------|------------------------------------------------------------------------------------|------------------------------------------------------------------------------------|------------------------------------------------------------------------------------|--------------------------------------------------------------------------------------|--------------------------------------------------------------------------------------|
| Surface marker       | Alveolar macrophages                                                               | Interstitial macrophages                                                           | Tissue monocytes                                                                   | Monocyte-derived DC                                                                | cDC1 CD141+ MDC (IRF8 dependent)                                                   | cDC2 CD1c+ MDC (IRF4 dependent)                                                      | PDC                                                                                  |
|                      |  |  |  |  |  |  |  |
| AF                   | ++                                                                                 | –                                                                                  | –                                                                                  | –                                                                                  | –                                                                                  | –                                                                                    | –                                                                                    |
| BTLA                 | n.d.                                                                               | n.d.                                                                               | n.d.                                                                               | –                                                                                  | ++                                                                                 | +                                                                                    | n.d.                                                                                 |
| CADM1                | n.d.                                                                               | n.d.                                                                               | n.d.                                                                               | n.d.                                                                               | +                                                                                  | –                                                                                    | n.d.                                                                                 |
| CD1a                 | –                                                                                  | –                                                                                  | –                                                                                  | –/+                                                                                | –                                                                                  | –/+                                                                                  | –                                                                                    |
| CD1c                 | –                                                                                  | –                                                                                  | –                                                                                  | +                                                                                  | –                                                                                  | +                                                                                    | –                                                                                    |
| CD11b                | +                                                                                  | +                                                                                  | +                                                                                  | +                                                                                  | –                                                                                  | +                                                                                    | –                                                                                    |
| CD11c                | +                                                                                  | +                                                                                  | +                                                                                  | +                                                                                  | +                                                                                  | +                                                                                    | –                                                                                    |
| CD14                 | –                                                                                  | +                                                                                  | +                                                                                  | +                                                                                  | –                                                                                  | –                                                                                    | –                                                                                    |
| CD16                 | +                                                                                  | +                                                                                  | ++                                                                                 | –                                                                                  | –                                                                                  | –                                                                                    | –                                                                                    |
| CD64                 | +                                                                                  | +                                                                                  | +                                                                                  | –                                                                                  | +                                                                                  | +                                                                                    | –                                                                                    |
| CD103                | +                                                                                  | n.d.                                                                               | –                                                                                  | –                                                                                  | –/+                                                                                | +                                                                                    | +                                                                                    |
| CD123                | –                                                                                  | –                                                                                  | –                                                                                  | –/+                                                                                | –                                                                                  | –/+                                                                                  | +                                                                                    |
| CD141                | +                                                                                  | –                                                                                  | –                                                                                  | –/+                                                                                | ++                                                                                 | +                                                                                    | –                                                                                    |
| CD163                | +                                                                                  | +                                                                                  | +                                                                                  | +                                                                                  | –                                                                                  | –                                                                                    | –                                                                                    |
| CD169                | +                                                                                  | –                                                                                  | n.d.                                                                               | –                                                                                  | –                                                                                  | –                                                                                    | –                                                                                    |
| CD172a               | n.d.                                                                               | n.d.                                                                               | n.d.                                                                               | +                                                                                  | –                                                                                  | +                                                                                    | n.d.                                                                                 |
| CD206                | +                                                                                  | +                                                                                  | +                                                                                  | +                                                                                  | –                                                                                  | +                                                                                    | –                                                                                    |
| CD207                | n.d.                                                                               | n.d.                                                                               | n.d.                                                                               | n.d.                                                                               | –                                                                                  | –/+                                                                                  | –                                                                                    |
| CD303                | –                                                                                  | –                                                                                  | –                                                                                  | –                                                                                  | –                                                                                  | –                                                                                    | +                                                                                    |
| Clec9A               | –                                                                                  | –                                                                                  | –                                                                                  | –                                                                                  | +                                                                                  | –                                                                                    | –                                                                                    |
| HLA-DR               | +                                                                                  | +                                                                                  | +                                                                                  | +                                                                                  | ++                                                                                 | ++                                                                                   | ++                                                                                   |
| Lineage <sup>a</sup> | –                                                                                  | –                                                                                  | –                                                                                  | –                                                                                  | –                                                                                  | –                                                                                    | –                                                                                    |
| TGFbR                | n.d.                                                                               | n.d.                                                                               | n.d.                                                                               | n.d.                                                                               | +                                                                                  | +                                                                                    | n.d.                                                                                 |
| XCR1                 | –                                                                                  | –                                                                                  | –                                                                                  | –                                                                                  | +                                                                                  | –                                                                                    | –                                                                                    |

<sup>a</sup>CD3, CD19, CD20, CD56, CD66abce.

n.d., not determined; DCs, dendritic cells; PDC, plasmacytoid DC; cDC, classical DC; IRF, interferon regulatory factor; MDC, myeloid DC.

<https://www.frontiersin.org/articles/10.3389/fimmu.2017.00499/full>



GENERAL INFORMATION<sup>1</sup>

|                                 |                                   |
|---------------------------------|-----------------------------------|
| Gene name <sup>1</sup>          | ACE2                              |
| Gene description                | Angiotensin I converting enzyme 2 |
| Predicted location <sup>1</sup> | Membrane, Secreted                |

HUMAN PROTEIN ATLAS INFORMATION

|                                                  |                                                     |
|--------------------------------------------------|-----------------------------------------------------|
| Secretome annotation <sup>i</sup>                | Secreted to blood                                   |
| Secretome annotation comment                     | Secreted form from proteolytic cleavage or shedding |
| RNA blood cell lineage specificity <sup>i</sup>  | Not detected                                        |
| RNA blood cell lineage distribution <sup>i</sup> | Not detected                                        |
| RNA blood cell type specificity <sup>i</sup>     | Not detected                                        |
| RNA blood cell type distribution <sup>i</sup>    | Not detected                                        |
| Blood-based immunoassay <sup>i</sup>             | Not detected                                        |
| Mass spectrometry <sup>i</sup>                   | Detected                                            |

BLOOD CELL TYPE EXPRESSION (RNA)<sup>i</sup>

Consensus dataset<sup>i</sup>

RNA cell type specificity: Not detected

Lineage Expression Alphabetical

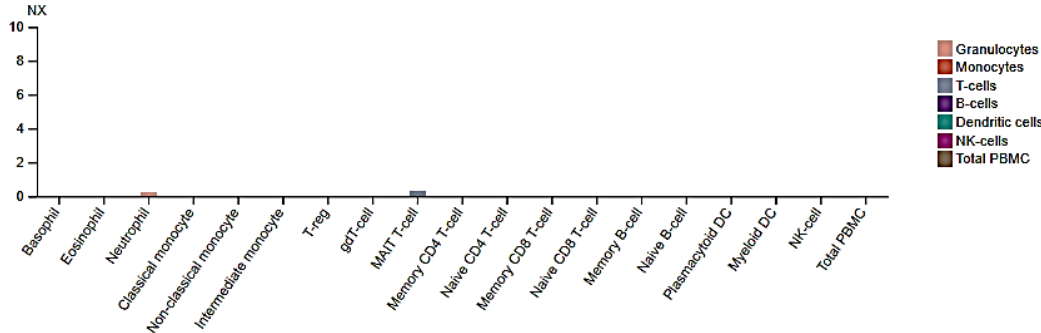

HPA scaled dataset<sup>i</sup>

Lineage Expression Alphabetical

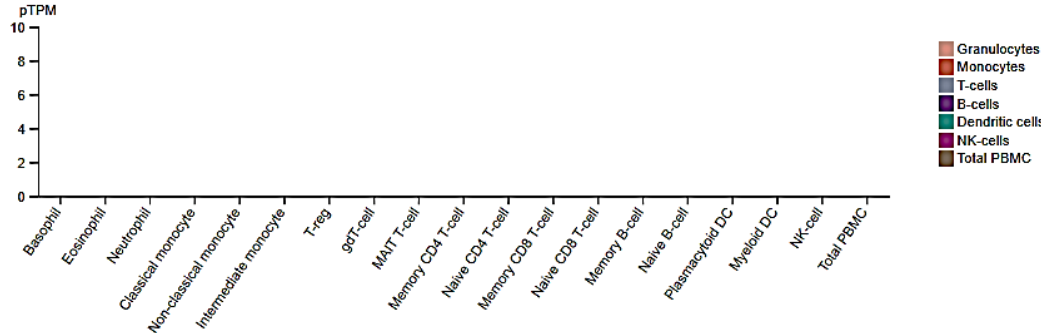

Monaco scaled dataset<sup>i</sup>

Lineage Expression Alphabetical

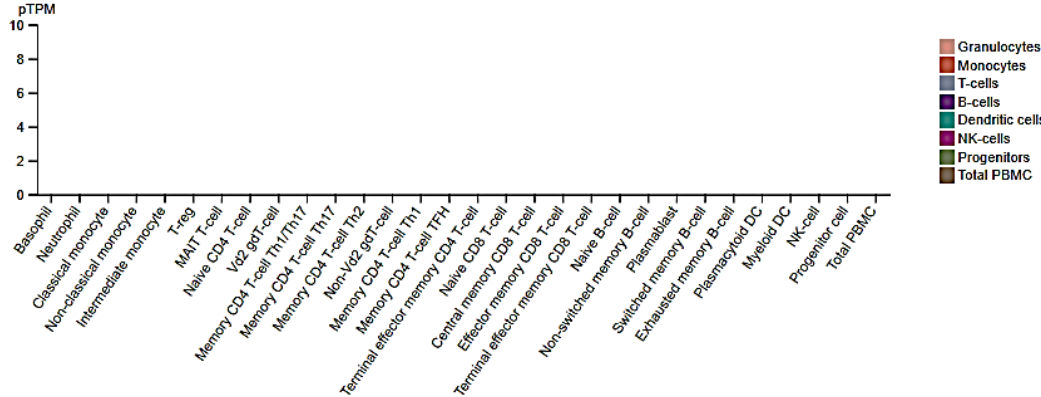

Schmiedel dataset<sup>i</sup>

Lineage Expression Alphabetical

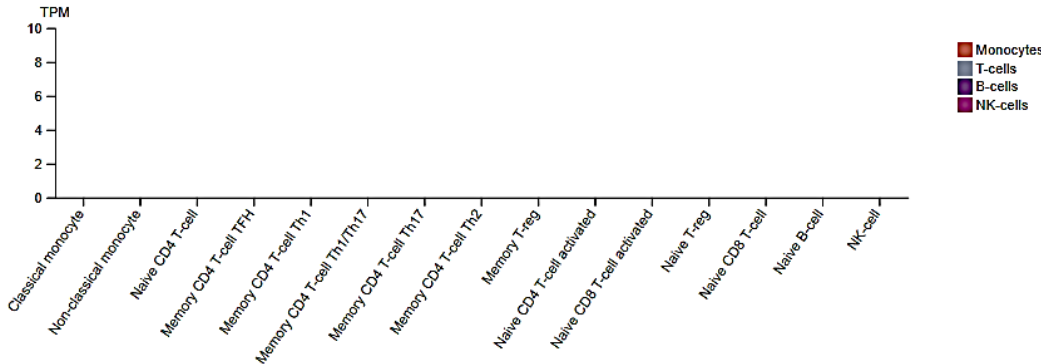

Supplement: Supplementary file 1 [file supplementary]
